# Supplementary material for: Age-Related Serum Biochemical Reference Intervals Established for Unweaned Calves and Piglets in the Post-weaning Period
Source: Front Vet Sci. 2019 Apr 24;6:123. doi: 10.3389/fvets.2019.00123 (PMC6491529; doi:10.3389/fvets.2019.00123)
Supplement: Supplementary file 4 [file Table_4.xlsx]

## Sheet: Sheet1
Table S4. TukeyHSD posthoc test with Bonferroni correction-calf.
	comparison	Mean Difference	Lower Bound	Upper Bound	Tukey p-Value	Bonferroni p-value Adjusted
ALT (U/L)	2w-24h	-5.96	-7.18	-4.75	0	0
	5w-24h	-4.52	-5.73	-3.31	0	0
	7w-24h	-3.24	-4.49	-1.99	0	0
	5w-2w	1.45	0.81	2.08	0	0
	7w-2w	2.72	2.03	3.42	0	0
	7w-5w	1.28	0.59	1.97	0	0
AST (U/L)	2w-24h	-50.86	-57.28	-44.43	0	0
	5w-24h	-45.28	-51.69	-38.86	0	0
	7w-24h	-50	-56.6	-43.4	0	0
	5w-2w	5.58	2.23	8.93	0	0
	7w-2w	0.86	-2.84	4.55	0.93	1
	7w-5w	-4.72	-8.4	-1.05	0.01	0.03
Cholesterol (mg/dL)	2w-24h	35.41	21.63	49.18	0	0
	5w-24h	46.01	32.26	59.76	0	0
	7w-24h	29.43	15.28	43.59	0	0
	5w-2w	10.6	3.42	17.78	0	0.01
	7w-2w	-5.98	-13.9	1.95	0.21	1
	7w-5w	-16.58	-24.46	-8.7	0	0
Creatinine (mg/dL)	2w-24h	-0.21	-0.3	-0.13	0	0
	5w-24h	-0.38	-0.47	-0.3	0	0
	7w-24h	-0.54	-0.63	-0.46	0	0
	5w-2w	-0.17	-0.21	-0.13	0	0
	7w-2w	-0.33	-0.38	-0.28	0	0
	7w-5w	-0.16	-0.21	-0.11	0	0
GGT (U/L)	2w-24h	-1499.67	-1614.94	-1384.41	0	0
	5w-24h	-1575.97	-1691.03	-1460.91	0	0
	7w-24h	-1583.71	-1702.12	-1465.29	0	0
	5w-2w	-76.3	-136.37	-16.22	0.01	0.04
	7w-2w	-84.03	-150.32	-17.75	0.01	0.04
	7w-5w	-7.74	-73.66	58.19	0.99	1
Glucose (mg/dL)	2w-24h	-15.18	-25.19	-5.17	0	0
	5w-24h	-24.01	-34	-14.01	0	0
	7w-24h	-32.8	-43.09	-22.52	0	0
	5w-2w	-8.83	-14.05	-3.61	0	0
	7w-2w	-17.62	-23.38	-11.86	0	0
	7w-5w	-8.79	-14.52	-3.07	0	0
GPx (U/L)	2w-24h	-341.38	-445.56	-237.21	0	0
	5w-24h	-425.29	-529.24	-321.35	0	0
	7w-24h	-409.3	-516.32	-302.29	0	0
	5w-2w	-83.91	-138.38	-29.44	0	0
	7w-2w	-67.92	-128.05	-7.8	0.02	0.12
	7w-5w	15.99	-43.74	75.72	0.9	1
Haptoglobin (mg/mL)	2w-24h	-0.04	-0.11	0.03	0.39	1
	5w-24h	-0.04	-0.11	0.03	0.42	1
	7w-24h	-0.05	-0.12	0.02	0.18	1
	5w-2w	0	-0.03	0.04	1	1
	7w-2w	-0.01	-0.05	0.03	0.83	1
	7w-5w	-0.01	-0.05	0.02	0.77	1
NEFAs (mmol/L)	2w-24h	-0.3	-0.34	-0.27	0	0
	5w-24h	-0.26	-0.29	-0.22	0	0
	7w-24h	-0.22	-0.26	-0.19	0	0
	5w-2w	0.05	0.03	0.06	0	0
	7w-2w	0.08	0.06	0.1	0	0
	7w-5w	0.03	0.01	0.05	0	0
TP (g/dL)	2w-24h	-0.91	-1.2	-0.62	0	0
	5w-24h	-1.04	-1.32	-0.75	0	0
	7w-24h	-1.22	-1.52	-0.93	0	0
	5w-2w	-0.13	-0.28	0.02	0.14	0.82
	7w-2w	-0.31	-0.48	-0.14	0	0
	7w-5w	-0.18	-0.35	-0.02	0.02	0.13
SOD (U/mL)	2w-24h	-0.59	-0.73	-0.46	0	0
	5w-24h	-0.67	-0.8	-0.54	0	0
	7w-24h	-0.67	-0.81	-0.53	0	0
	5w-2w	-0.08	-0.15	-0.01	0.02	0.15
	7w-2w	-0.08	-0.16	0	0.05	0.27
	7w-5w	0	-0.08	0.08	1	1
TGs (mg/dL)	2w-24h	-19.53	-26.19	-12.87	0	0
	5w-24h	-17.23	-23.88	-10.59	0	0
	7w-24h	-14.99	-21.83	-8.15	0	0
	5w-2w	2.3	-1.17	5.77	0.32	1
	7w-2w	4.54	0.72	8.37	0.01	0.07
	7w-5w	2.25	-1.56	6.06	0.43	1
Urea (mg/dL)	2w-24h	-4.17	-6.97	-1.37	0	0
	5w-24h	-5.45	-8.25	-2.66	0	0
	7w-24h	-8.15	-11.03	-5.28	0	0
	5w-2w	-1.29	-2.75	0.17	0.11	0.64
	7w-2w	-3.98	-5.59	-2.37	0	0
	7w-5w	-2.7	-4.3	-1.1	0	0
